# Supplementary material for: Multiplexed detection of SARS-CoV-2 and other respiratory infections in high throughput by SARSeq
Source: PubMed Central journal article supplement (PMC8149640; doi:10.1038/s41467-021-22664-5), 2021-05-25
Supplement: 41467_2021_22664_MOESM1_ESM.pdf [file 41467_2021_22664_MOESM1_ESM.pdf]

## Supplemental Figures and Table

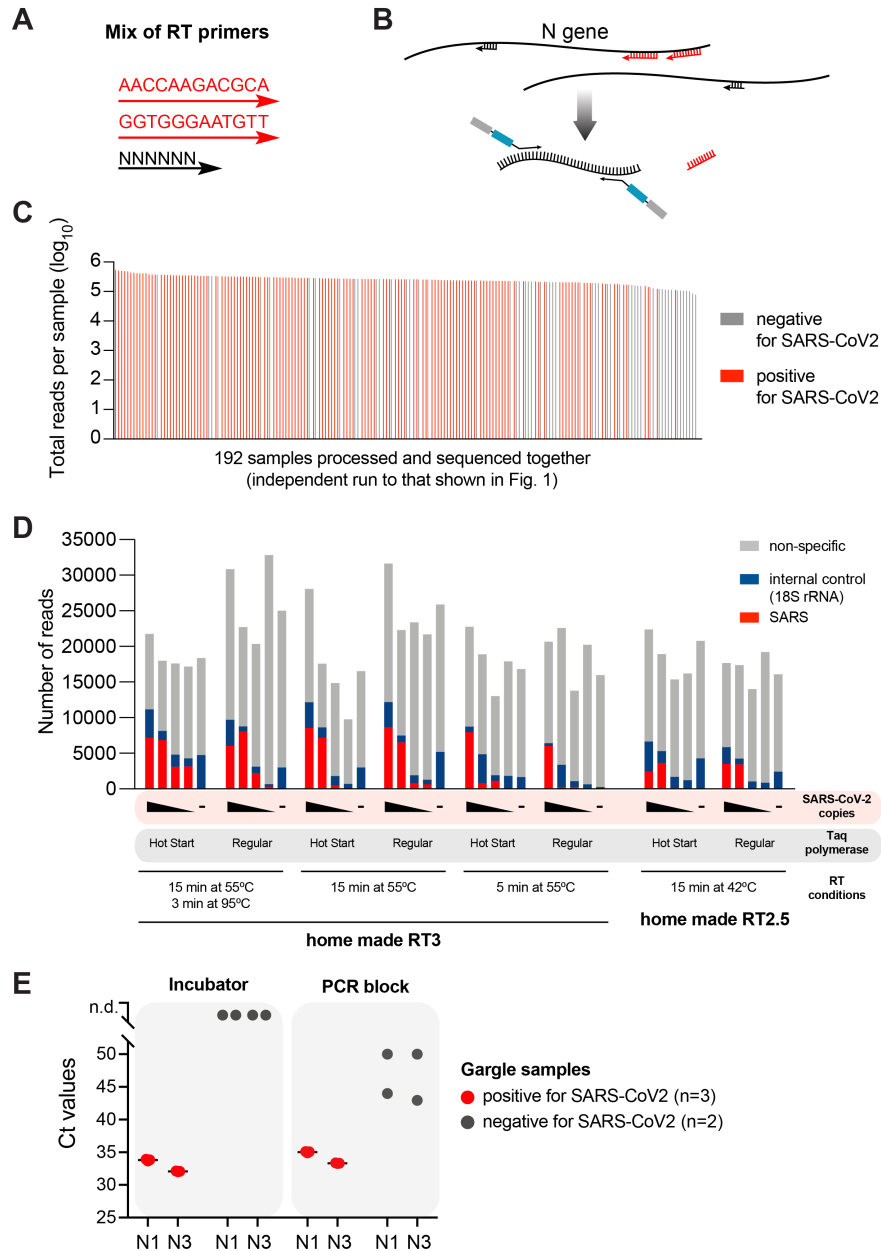

**Suppl. Fig. 1. Two-step RT-PCR strategy enables specificity and even read distribution.** **A.** The RT primer mix contains two N-gene specific 12-mers (actual sequences shown) in addition to random hexamers. **B.** Scheme of the RT priming sites relative to the specific PCR primers. For SARS-CoV-2 the 12-mers generate a cDNA into which the PCR primers are nested. **C.** Total reads per sample across a set of 192 samples that contain several negative samples as well as positive samples with titers spanning 4 orders of magnitude. Our 2-step RT-PCR strategy followed by end-point PCR lead to a very even distribution of NGS reads per sample independent of viral titer, ensuring equal representation on the sequencing flow cell. **D.** Amplicon counts measured by NGS after RT and PCR using different conditions, as indicated, on gargle samples from a healthy individual mixed 1:1 with QuickExtract and spiked with a serial dilution of synthetic SARS-CoV-2 RNA (5000, 500, 50, 5, 0 copies). **E.** Quantitative RT-PCR analysis (based on fluorescent DNA dye, Promega) on positive and negative gargle samples, for which the RT reaction was conducted for 15 min at 55°C either in a PCR block or a humid incubator. All data points are shown, n=3 for positive samples, n=2 for negative samples.

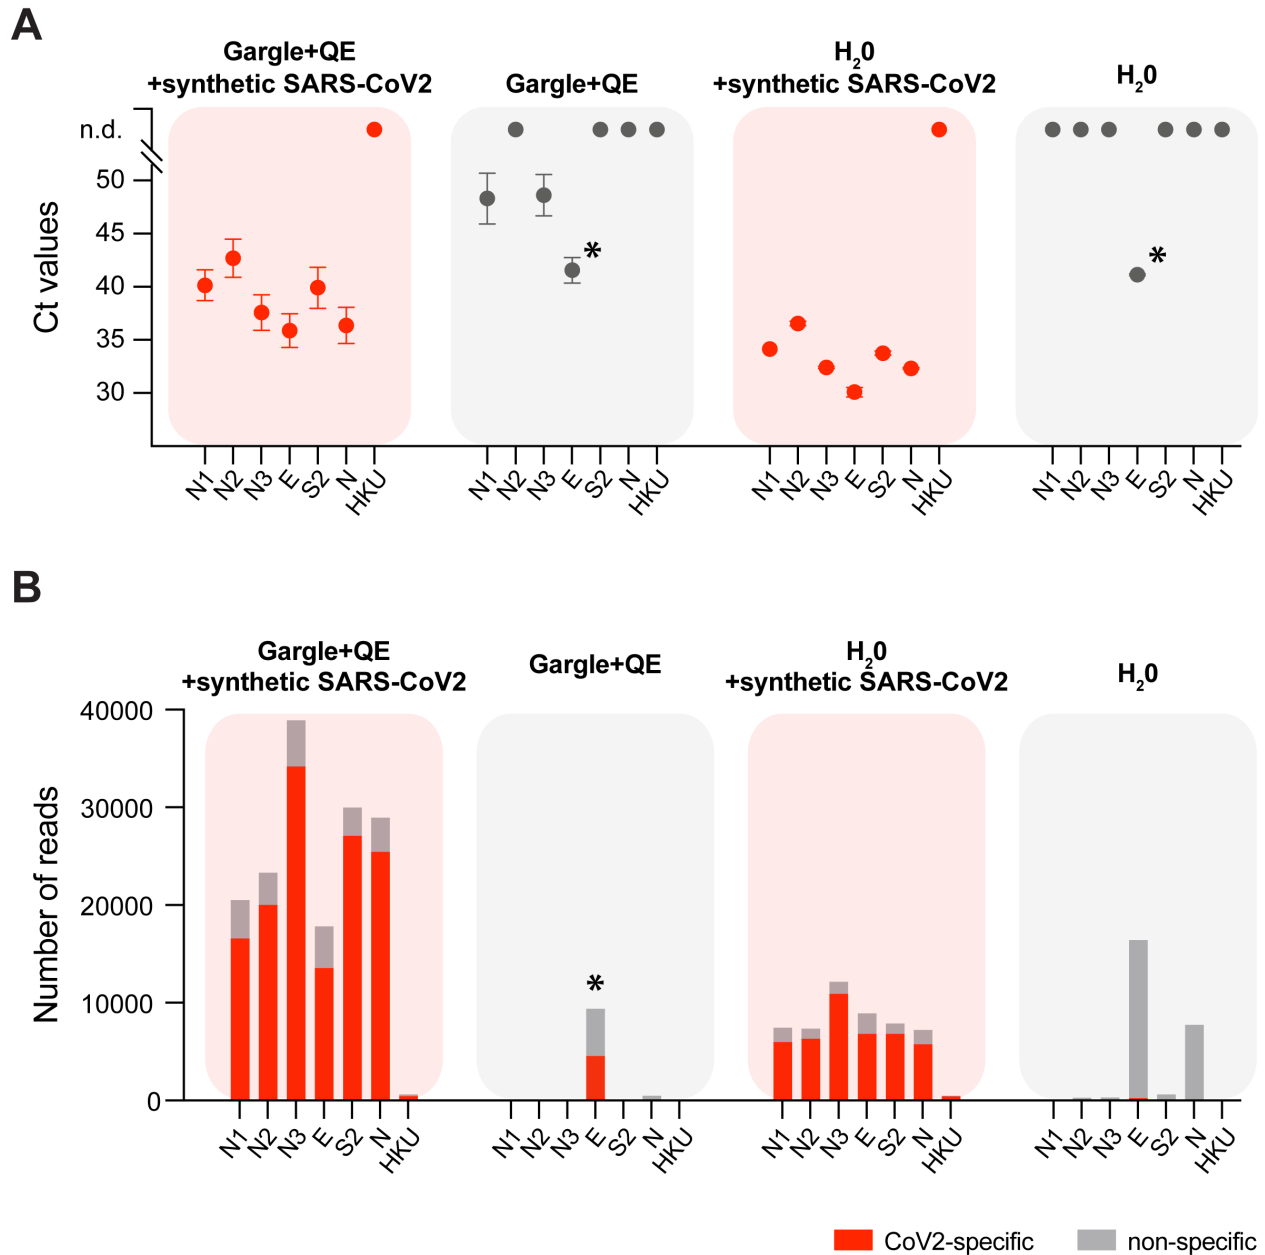

**Suppl. Fig. 2. Choice of SARS-CoV-2 specific primers. A.** qPCR using a fluorescent DNA dye (Promega) on samples generated by mixing gargle from a healthy individual or water, with 1000 copies of synthetic SARS-CoV-2 RNA. Primers used were based on previous publications<sup>33,35</sup>, but were extended at the 5' by the sequences required for NGS, namely i5/i7, a random stagger, and a barcode. Several primer pairs showed a good template dependent generation of double stranded DNA. Mean and standard deviation are shown, n=3. **B.** Number of specific and non-specific reads obtained by SARSeq using seven different primer pairs directed at distinct regions of the SARS-CoV-2 genome (N1, N2, N3 and S2 from the CDC; E from Sarbeco; N from China and HKU). Primers were tested on synthetic SARS-CoV-2 RNA diluted in gargle from a healthy individual or in water. All primer pairs, except for HKU efficiently amplified viral products. Asterisk denotes evident contamination with an E gene amplicon used in other testing efforts.

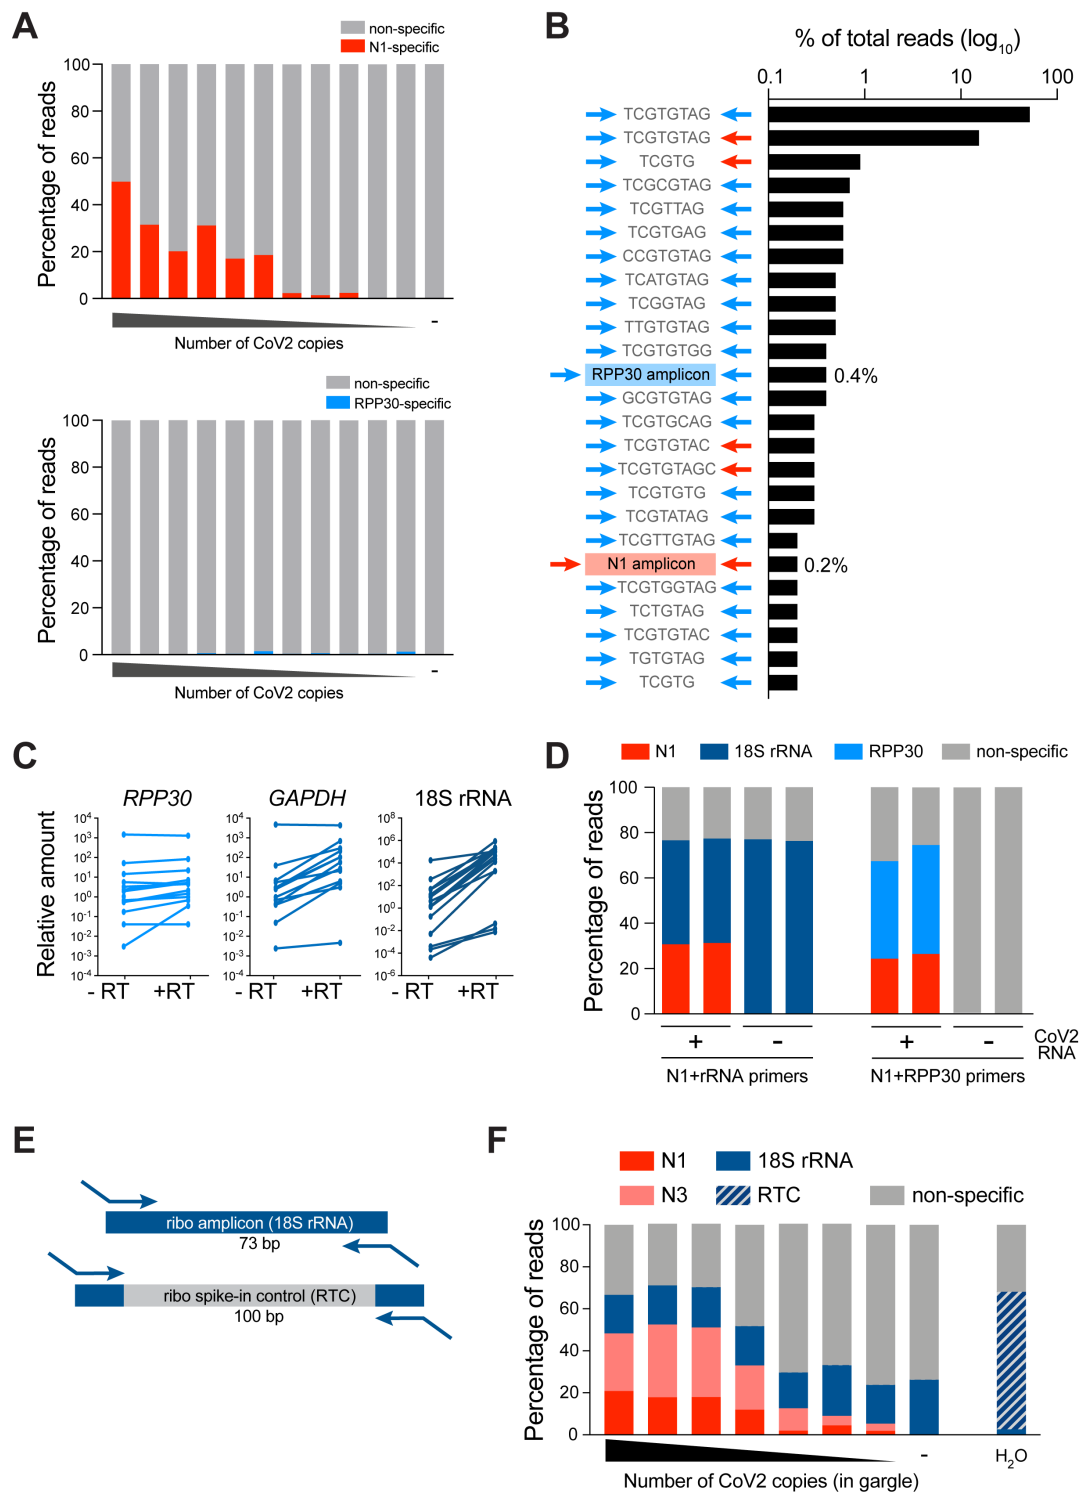

**Suppl. Fig. 3. A control primer pair targeting 18S rRNA improves assay performance compared to the widely used *RPP30* primers.** **A.** Percentage of specific and non-specific NGS reads obtained with the SARS-CoV-2 N gene-specific primer pair N1 or the human RNAse P (*RPP30*)-specific primer pair designed by the CDC<sup>35</sup>. RT-PCR was performed on inactivated gargle-QE samples spiked with a range of 5120 to 5 molecules of synthetic template in a two-fold dilution series, as well as 0 molecules. Non-specific amplicons are defined as

amplicons generated by the respective matched primer pairs but with incorrect sequence in between. This experiment was performed in a first-generation buffer system that was further modified in subsequent experiments. **B.** Analysis of all amplicons generated in the pool of conditions shown in A. Non-specific amplicons typically incorporated a short stretch of sequence complementary to some primer sequences and were almost exclusively generated by at least one *RPP30*-specific primer. Specific amplicons add up to <1% of reads in this condition. **C.** qPCR analysis (using a fluorescent DNA dye Promega) of *RPP30* primers and two alternative internal control primer pairs in the presence and absence of reverse transcriptase on RNA purified from gargle of 16 individuals. Ct values are transformed to relative differences. **D.** Read distribution from an NGS experiment similar to A, but with the ribosome amplicon as internal control in comparison to RNaseP, and in the final buffer conditions used for the rest of the experiments (and described in the methods). RT-PCR was performed on inactivated gargle-QE samples with or without synthetic SARS-CoV-2 RNA. Although *RPP30* primers performed well in the presence of synthetic viral RNA, they again did not produce specific reads on gargle alone and therefore do not provide a good measure for sample quality under our assay conditions. **E.** Scheme of the RT control (RTC) spike-in; an amplicon with identical primer binding sites to the ribosomal internal control yet different and longer intermediate sequence was synthesized, cloned, and T7 transcribed. The RTC was added during the RT at 1000 molecules/reaction. The ratio of ribosomal to RTC reads serves as a sample quality measurement. Reactions without reads for the ribosome or the RTC amplicons indicate an inhibited/failed RT-PCR reaction. **F.** Read distribution from an NGS experiment containing three primer pairs (N1, N3 and rRNA as internal control) and with addition of the RTC spike-in. The large fraction of specific reads enables high sensitivity and scalability.

**A**

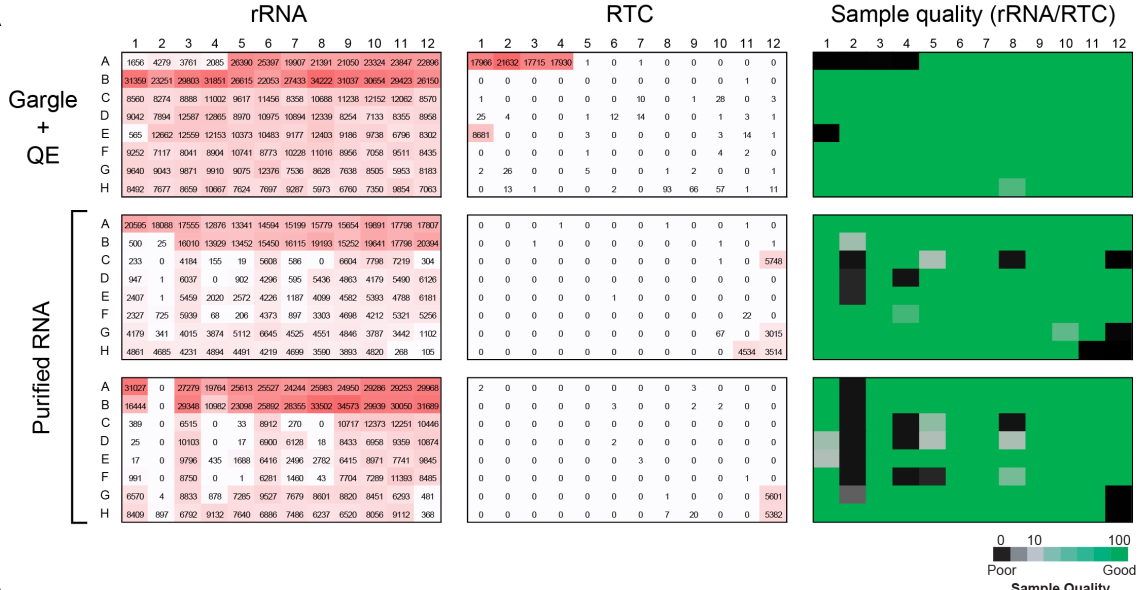

**B**

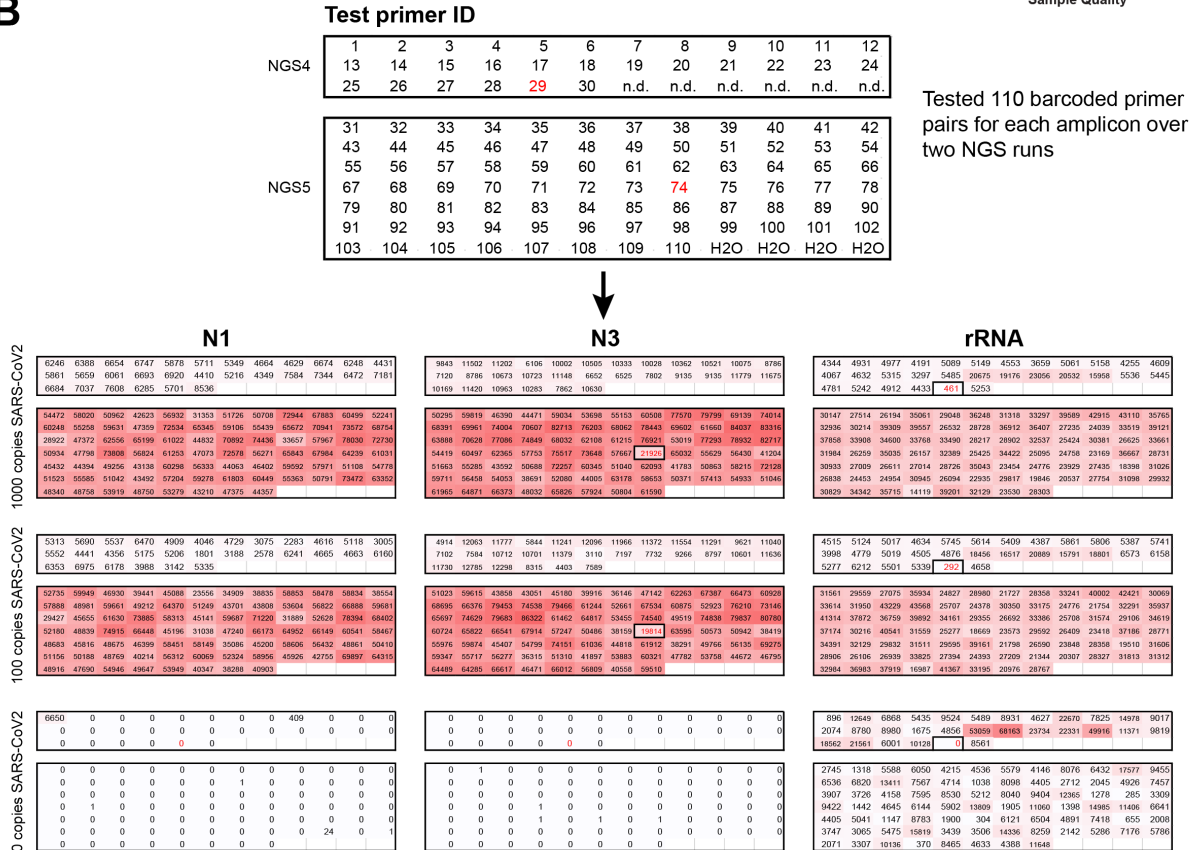

**Suppl. Fig. 4. Internal control primers and validation of the amplicon-specific primer pairs containing 96 unique dual indices. A.** NGS reads obtained from 2 different sample plates. The plate containing gargle inactivated in QuickExtract generated a good number of reads for almost all samples with few reads in the first four negative control wells (some reads are likely due to rRNA contamination in the enzyme preps), where instead high read counts for the RTC are observed. The other plate contained purified RNA from samples obtained in a clinical setting and was run in duplicates (both are shown). For this plate, frequently both the rRNA and RTC reads failed in certain positions. Given that in absence of RNA the RTC amplicon is expected to amplify very efficiently, we attribute this to the presence of some inhibitor of RT and/or PCR, likely remaining from the RNA purification in these positions. Negative control wells for the latter two plates are positions G12 and H12.

**B.** Testing of primer pairs for three amplicons (SARS-CoV-2 N1 and N3, and human ribosome) carrying extensions with 110 unique dual indices. Primer pairs with indices #29 were excluded as they did not efficiently produce the ribosome amplicon; primer pairs with indices #74 were excluded as they did not efficiently produce the N3 amplicon. Primer pairs 1-4 can be used efficiently but were not included in the final set because these indices were frequently used in the lab during initial setup of the method and we wanted to eliminate all possible sources of cross contamination.



**A**

|                               |                 | N1 amplicon reads    |      |                          |      |                    |      | N3 amplicon reads    |       |                          |       |                    |       |       |       |       |       |       |       |
|-------------------------------|-----------------|----------------------|------|--------------------------|------|--------------------|------|----------------------|-------|--------------------------|-------|--------------------|-------|-------|-------|-------|-------|-------|-------|
|                               |                 | synthetic RNA in H2O |      | synthetic RNA in QE-HBSS |      | virions in QE-HBSS |      | synthetic RNA in H2O |       | synthetic RNA in QE-HBSS |       | virions in QE-HBSS |       |       |       |       |       |       |       |
| Ribosomal spike-in (RTC) only | 1 copy/reaction | 0                    | 1587 | 4615                     | 0    | 7104               | 8079 | 18424                | 4297  | 0                        | 0     | 16691              | 21055 | 0     | 40815 | 20755 | 44921 | 3712  | 0     |
|                               |                 | 0                    | 0    | 0                        | 0    | 0                  | 6254 | 0                    | 22763 | 22770                    | 0     | 0                  | 0     | 0     | 0     | 29900 | 0     | 46506 | 53074 |
|                               |                 | 0                    | 0    | 635                      | 1084 | 0                  | 0    | 0                    | 501   | 3930                     | 0     | 0                  | 376   | 1403  | 0     | 0     | 1708  | 289   | 0     |
|                               |                 | 0                    | 0    | 0                        | 0    | 0                  | 0    | 0                    | 6349  | 2001                     | 0     | 0                  | 0     | 0     | 0     | 0     | 834   | 13032 | 5173  |
|                               |                 | 0                    | 1526 | 0                        | 0    | 0                  | 2887 | 0                    | 3999  | 0                        | 0     | 5867               | 0     | 7440  | 0     | 14679 | 0     | 7537  | 0     |
|                               |                 | 901                  | 0    | 0                        | 0    | 1538               | 1263 | 7983                 | 1791  | 3771                     | 4920  | 0                  | 0     | 0     | 6711  | 10433 | 11770 | 3449  | 6663  |
|                               | 0               | 0                    | 0    | 1670                     | 2399 | 42                 | 0    | 2526                 | 7116  | 0                        | 0     | 0                  | 3133  | 5973  | 0     | 2789  | 5428  | 0     |       |
|                               | 0               | 0                    | 0    | 0                        | 0    | 0                  | 984  | 0                    | 1580  | 0                        | 4483  | 0                  | 0     | 0     | 0     | 0     | 0     | 0     | 3369  |
|                               | 3 copy/reaction | 638                  | 1630 | 4537                     | 3355 | 2438               | 0    | 15315                | 7913  | 15461                    | 0     | 15021              | 21155 | 23176 | 16815 | 0     | 48409 | 39772 | 25154 |
|                               |                 | 1076                 | 0    | 835                      | 0    | 6257               | 3072 | 13725                | 0     | 3348                     | 9609  | 0                  | 17414 | 0     | 14594 | 0     | 36411 | 38122 | 18937 |
|                               |                 | 4464                 | 712  | 112                      | 741  | 3249               | 1683 | 4103                 | 4549  | 3697                     | 5961  | 0                  | 177   | 2043  | 3512  | 3062  | 7219  | 5732  | 5900  |
|                               |                 | 240                  | 334  | 0                        | 1829 | 0                  | 845  | 5986                 | 3316  | 7060                     | 1346  | 1679               | 1     | 4711  | 2088  | 759   | 6446  | 14598 | 6102  |
| 3677                          |                 | 2195                 | 0    | 5646                     | 2557 | 748                | 7531 | 9259                 | 8028  | 2580                     | 8772  | 5136               | 12186 | 3037  | 7300  | 4250  | 0     | 11295 |       |
| 1355                          |                 | 711                  | 0    | 2902                     | 0    | 0                  | 4433 | 7744                 | 10986 | 4417                     | 6002  | 0                  | 8282  | 0     | 0     | 889   | 10241 | 7573  |       |
| 2934                          | 2461            | 424                  | 1032 | 0                        | 1135 | 2145               | 2710 | 4812                 | 3321  | 5013                     | 1869  | 3840               | 5339  | 0     | 6138  | 9451  | 3967  |       |       |
| 1401                          | 0               | 2219                 | 1045 | 2221                     | 5366 | 13213              | 9040 | 11647                | 5395  | 0                        | 3621  | 428                | 6013  | 3615  | 11601 | 9405  | 10022 |       |       |
| 10 copy/reaction              | 2176            | 9737                 | 5772 | 7574                     | 3419 | 0                  | 9017 | 7417                 | 6906  | 6176                     | 23369 | 22913              | 28309 | 23596 | 9876  | 22500 | 31220 | 24338 |       |
|                               | 1956            | 1231                 | 5184 | 4454                     | 6691 | 11330              | 7984 | 11242                | 12095 | 14745                    | 14514 | 12988              | 15653 | 19354 | 28088 | 22964 | 29442 | 24319 |       |
|                               | 5110            | 1849                 | 507  | 1253                     | 3532 | 2283               | 2332 | 1430                 | 6407  | 4924                     | 336   | 673                | 2279  | 3880  | 4232  | 2381  | 3679  | 7801  |       |
|                               | 2448            | 3186                 | 1978 | 2598                     | 3030 | 1495               | 3336 | 3766                 | 4976  | 4467                     | 6627  | 5169               | 5353  | 5730  | 2810  | 3108  | 10380 | 4285  |       |
|                               | 981             | 1315                 | 2408 | 5092                     | 3486 | 1115               | 7635 | 4098                 | 5720  | 1232                     | 2854  | 8289               | 7079  | 8192  | 5783  | 3978  | 6094  | 7167  |       |
|                               | 4505            | 2460                 | 4184 | 2472                     | 2205 | 1353               | 9928 | 3493                 | 6887  | 7163                     | 8739  | 6703               | 5114  | 9342  | 5117  | 5297  | 7337  | 9714  |       |
|                               | 3055            | 1578                 | 1466 | 2910                     | 0    | 774                | 2655 | 2442                 | 6191  | 4879                     | 2748  | 1586               | 4786  | 0     | 1341  | 5337  | 6899  | 2716  |       |
|                               | 1530            | 5326                 | 969  | 1917                     | 4342 | 3446               | 7355 | 6923                 | 4933  | 1735                     | 8381  | 4407               | 532   | 3336  | 3117  | 6862  | 7785  | 4730  |       |

**B**

|                                |                 | N1 amplicon reads    |      |                          |      |                    |       | N3 amplicon reads    |       |                          |       |                    |       |       |       |       |       |       |       |
|--------------------------------|-----------------|----------------------|------|--------------------------|------|--------------------|-------|----------------------|-------|--------------------------|-------|--------------------|-------|-------|-------|-------|-------|-------|-------|
|                                |                 | synthetic RNA in H2O |      | synthetic RNA in QE-HBSS |      | virions in QE-HBSS |       | synthetic RNA in H2O |       | synthetic RNA in QE-HBSS |       | virions in QE-HBSS |       |       |       |       |       |       |       |
| N1, N3 and Ribosomal spike-ins | 1 copy/reaction | 0                    | 4349 | 0                        | 950  | 3138               | 391   | 7037                 | 3544  | 5217                     | 0     | 12048              | 15884 | 16979 | 20989 | 0     | 23169 | 6577  | 10455 |
|                                |                 | 0                    | 0    | 0                        | 0    | 2941               | 1757  | 0                    | 0     | 2179                     | 0     | 0                  | 0     | 5616  | 19459 | 0     | 5246  | 8132  | 0     |
|                                |                 | 2759                 | 0    | 0                        | 509  | 0                  | 1266  | 565                  | 676   | 4768                     | 2084  | 0                  | 94    | 1193  | 0     | 1442  | 1328  | 1620  | 0     |
|                                |                 | 0                    | 0    | 0                        | 183  | 0                  | 0     | 0                    | 2390  | 3389                     | 1820  | 0                  | 0     | 0     | 0     | 0     | 879   | 930   | 2354  |
|                                |                 | 0                    | 1033 | 0                        | 3249 | 0                  | 0     | 655                  | 5826  | 5624                     | 0     | 6878               | 0     | 9281  | 0     | 0     | 1265  | 7859  | 8444  |
|                                |                 | 0                    | 1139 | 0                        | 0    | 0                  | 168   | 5663                 | 915   | 2020                     | 0     | 2254               | 0     | 0     | 0     | 5622  | 5530  | 1757  | 6478  |
|                                | 0               | 908                  | 634  | 738                      | 1044 | 0                  | 2501  | 561                  | 2044  | 0                        | 1016  | 957                | 1204  | 1526  | 0     | 2843  | 3206  | 923   |       |
|                                | 0               | 0                    | 0    | 0                        | 5334 | 0                  | 4055  | 7798                 | 0     | 0                        | 0     | 625                | 0     | 1583  | 0     | 3857  | 6111  | 0     |       |
|                                | 3 copy/reaction | 0                    | 0    | 0                        | 5843 | 7205               | 0     | 11110                | 7611  | 2130                     | 0     | 0                  | 0     | 23614 | 25551 | 0     | 38179 | 36931 | 15644 |
|                                |                 | 0                    | 0    | 0                        | 1893 | 2593               | 0     | 5775                 | 17769 | 11247                    | 0     | 0                  | 0     | 3431  | 8359  | 0     | 22203 | 40006 | 35715 |
|                                |                 | 0                    | 2259 | 0                        | 0    | 1803               | 1023  | 3034                 | 2425  | 5185                     | 2432  | 3244               | 1048  | 0     | 3240  | 939   | 5046  | 3255  | 6524  |
|                                |                 | 0                    | 1260 | 864                      | 1127 | 1905               | 1027  | 5791                 | 3628  | 776                      | 0     | 2917               | 2353  | 3604  | 3999  | 1344  | 5170  | 10143 | 5135  |
| 1540                           |                 | 1220                 | 2049 | 935                      | 0    | 2927               | 10326 | 6431                 | 6112  | 4772                     | 5261  | 5285               | 2862  | 0     | 7965  | 6828  | 4936  | 5926  |       |
| 0                              |                 | 346                  | 0    | 1966                     | 2908 | 0                  | 3820  | 6536                 | 1965  | 0                        | 5549  | 4777               | 5643  | 7471  | 1     | 1630  | 7812  | 6723  |       |
| 1264                           | 983             | 0                    | 0    | 1603                     | 816  | 2371               | 2244  | 4019                 | 2569  | 4177                     | 0     | 0                  | 2956  | 1723  | 4609  | 5382  | 3204  |       |       |
| 0                              | 1531            | 2761                 | 1140 | 1819                     | 0    | 386                | 10372 | 4524                 | 0     | 7309                     | 5746  | 265                | 0     | 0     | 1785  | 10139 | 3715  |       |       |
| 10 copy/reaction               | 1427            | 5927                 | 7248 | 8623                     | 5187 | 6409               | 15970 | 8457                 | 16702 | 1571                     | 16790 | 17407              | 29611 | 31915 | 31188 | 28963 | 33629 | 17423 |       |
|                                | 1961            | 728                  | 4832 | 2620                     | 1518 | 4848               | 8253  | 10664                | 13907 | 6558                     | 12450 | 16800              | 25399 | 6155  | 19616 | 25891 | 31715 | 27717 |       |
|                                | 2981            | 1224                 | 640  | 314                      | 278  | 201                | 3814  | 2729                 | 8699  | 3021                     | 3025  | 750                | 897   | 1211  | 2111  | 4601  | 3563  | 8436  |       |
|                                | 1171            | 1324                 | 0    | 175                      | 1365 | 2882               | 3325  | 4475                 | 7511  | 2528                     | 4610  | 0                  | 1729  | 3005  | 3644  | 3109  | 9317  | 5394  |       |
|                                | 5219            | 851                  | 1186 | 5115                     | 2330 | 2392               | 8184  | 4046                 | 5702  | 6658                     | 5280  | 7199               | 9583  | 7527  | 7245  | 3281  | 6136  | 5004  |       |
|                                | 2817            | 739                  | 3820 | 1473                     | 3175 | 3090               | 9514  | 4098                 | 7478  | 6652                     | 7599  | 7062               | 3520  | 9973  | 10716 | 9014  | 7381  | 8539  |       |
|                                | 5225            | 3163                 | 1194 | 1233                     | 4708 | 1091               | 4932  | 3095                 | 8076  | 4722                     | 6606  | 1849               | 2905  | 7424  | 1869  | 7252  | 7316  | 3988  |       |
|                                | 5408            | 4084                 | 4353 | 1018                     | 3049 | 5050               | 6408  | 8881                 | 4638  | 9093                     | 6337  | 9860               | 429   | 3143  | 1855  | 6460  | 8073  | 6915  |       |

**Suppl. Fig. 6. Raw data for limit of detection experiments presented in Fig. 3B. A.** Read count table obtained in absence of N1- and N3- control-spike-in. **B.** Read count table obtained in presence of N1- and N3- control-spike-in.



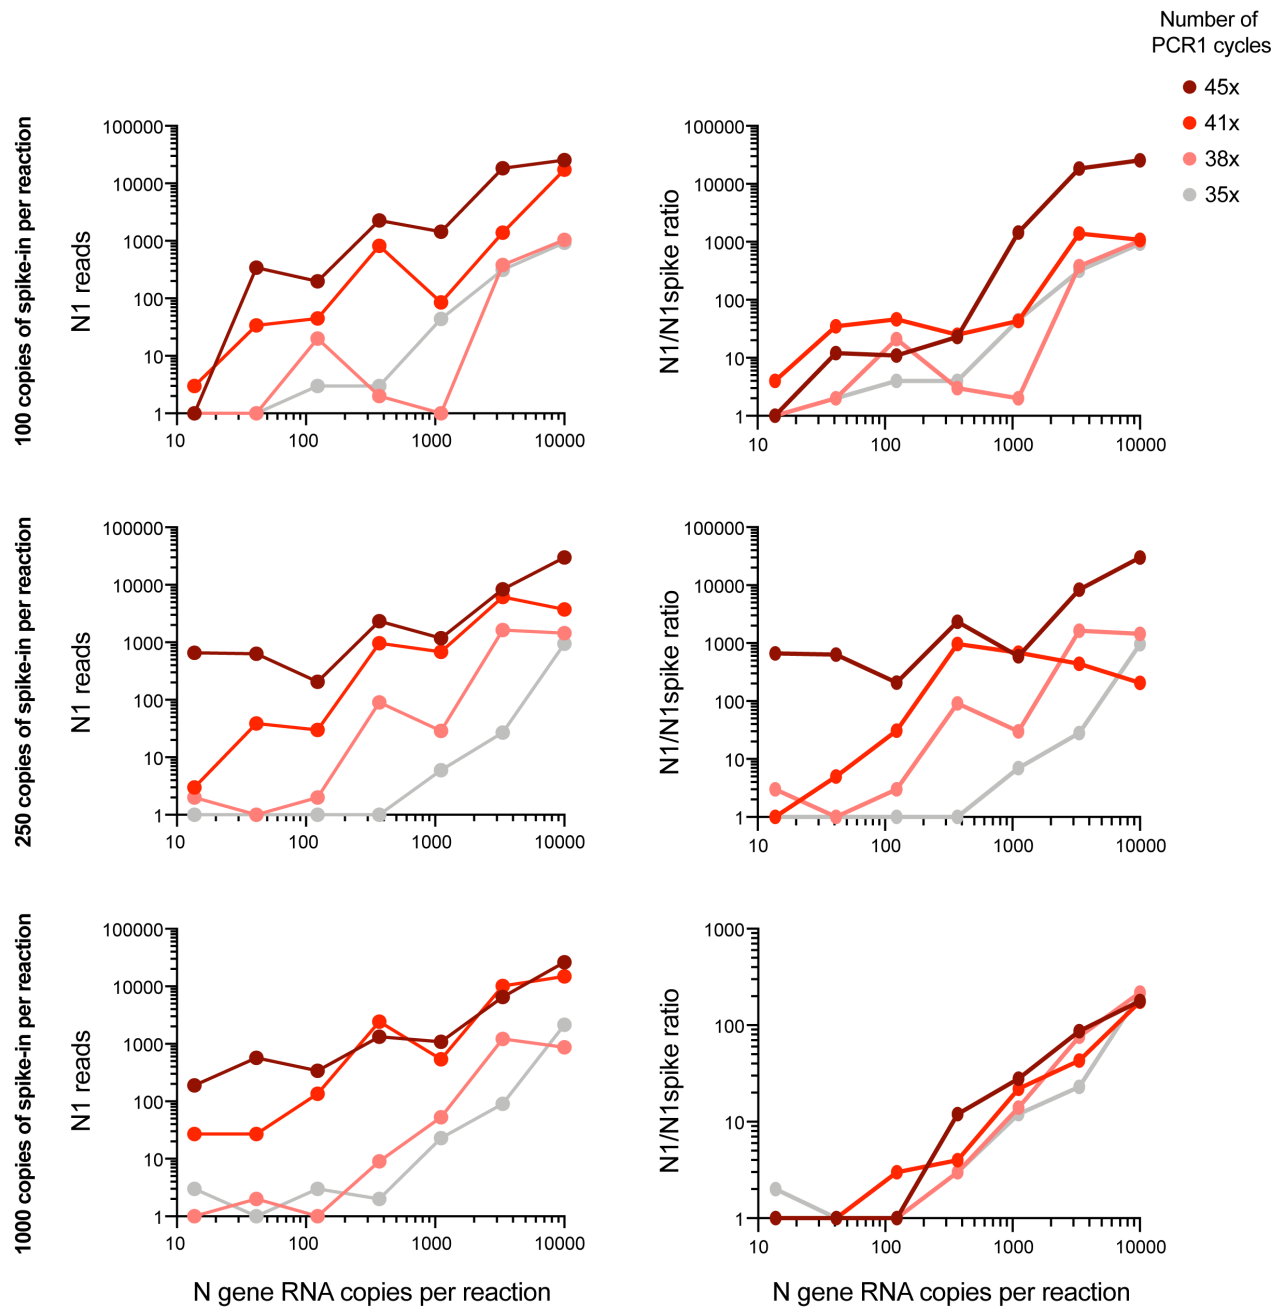

**Suppl. Fig. 7. Effects of cycle number and spike-in concentration on sensitivity and quantitiveness.** SARSeq was performed in the presence of 100, 250 or 1000 molecules of each N1 and N3 spike-ins (Fig. 3A) as well as 1000 copies of RTC (Suppl. Fig. 3C), on negative gargle samples mixed with QuickExtract and a serial dilution of synthetic SARS-CoV-2 N gene RNA. PCR1 was run for different number of cycles before pooling and running PCR2 for 8 cycles. Both the number of reads for the N1 amplicon, as well as the ratio between N1 and N1 spike-in reads are plotted. The data in the presence of 1000 molecules of spike-ins is also shown in Fig. 3C, D. Spike-in addition did not compromise sensitivity; cycle number on the other hand had the highest effect on sensitivity, as expected. Addition of higher spike-in concentration had a beneficial effect on quantitiveness, most evident when quantifying the ratio of N1/N1 spike, as proposed by the developers of Swab-seq (ref).

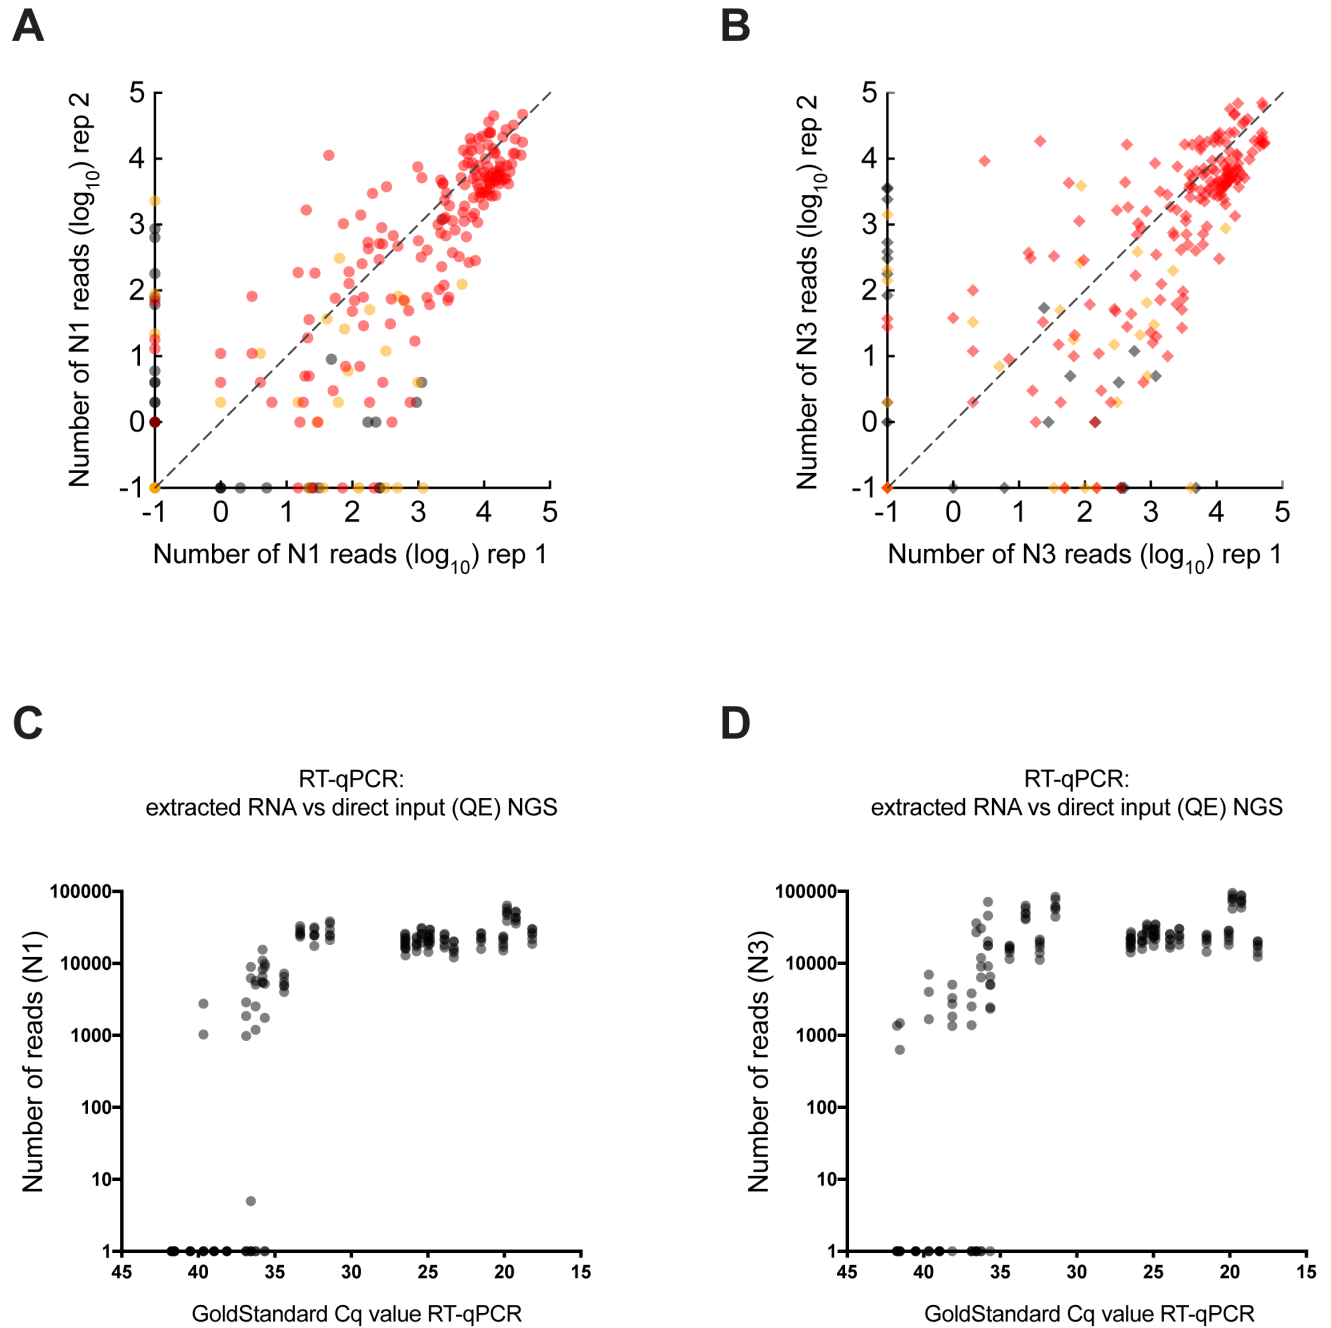

**Suppl. Fig. 8. Semiquantitative behaviour of SARSeq on patient samples.** **A, B.** Correlation of read counts of N1 (A) and N3 (B) amplicons across two independent SARSeq runs of the samples shown in Figure 5C, D. In red are individual samples also detected in two qPCR replicates, in orange are samples detected in one out of two qPCR replicates, and in gray those that were not detected by qPCR. **C, D.** Correlation between read counts for N1 (C) and N3 (D) amplicons and Ct values obtained by diagnostic qPCR. The qPCR analysis was performed on purified RNA, in parallel crude samples were measured in seven replicates by SARSeq, all replicates are shown as individual circles. SARSeq is robust until  $\sim$ Ct 36 and becomes probabilistic in samples with lower viral titers.

**A**

|                         | <i>gapdh</i> | rRNA | N1   | N3   | Inf A #1 | Inf A #2 | Inf B | HRV #1 | HRV #2 |
|-------------------------|--------------|------|------|------|----------|----------|-------|--------|--------|
| HEK cells               | 19,9         | 8,2  |      |      |          |          |       | 45,5   |        |
| HEK + synth. SARS-CoV-2 | 19,9         | 8,3  | 32,0 | 32,0 | 46,3     |          | 49,4  | 45,7   |        |
| HEK infected Inf A/WSN  | 20,8         | 8,2  |      |      | 18,9     | 23,0     | 49,3  | 44,3   |        |
| HEK infected Inf A/Wy   | 21,5         | 9,3  |      |      | 20,7     | 25,9     | 43,0  | 33,2   | 40,5   |
| HEK infected Inf B/Lee  | 20,2         | 8,9  |      |      | 46,5     |          | 28,9  | 40,8   |        |
| HEK infected HRV A1a    | 20,1         | 8,0  |      |      |          |          | 45,0  | 16,3   | 20,9   |
| HEK infected HRV A1b    | 19,8         | 8,1  |      |      |          |          |       | 16,7   | 21,3   |
| HEK infected HRV A2     | 19,4         | 7,7  |      |      | 48,8     |          | 46,1  | 11,7   | 16,3   |
| H <sub>2</sub> O        |              | 47,4 |      |      | 47,4     |          |       |        |        |

**B**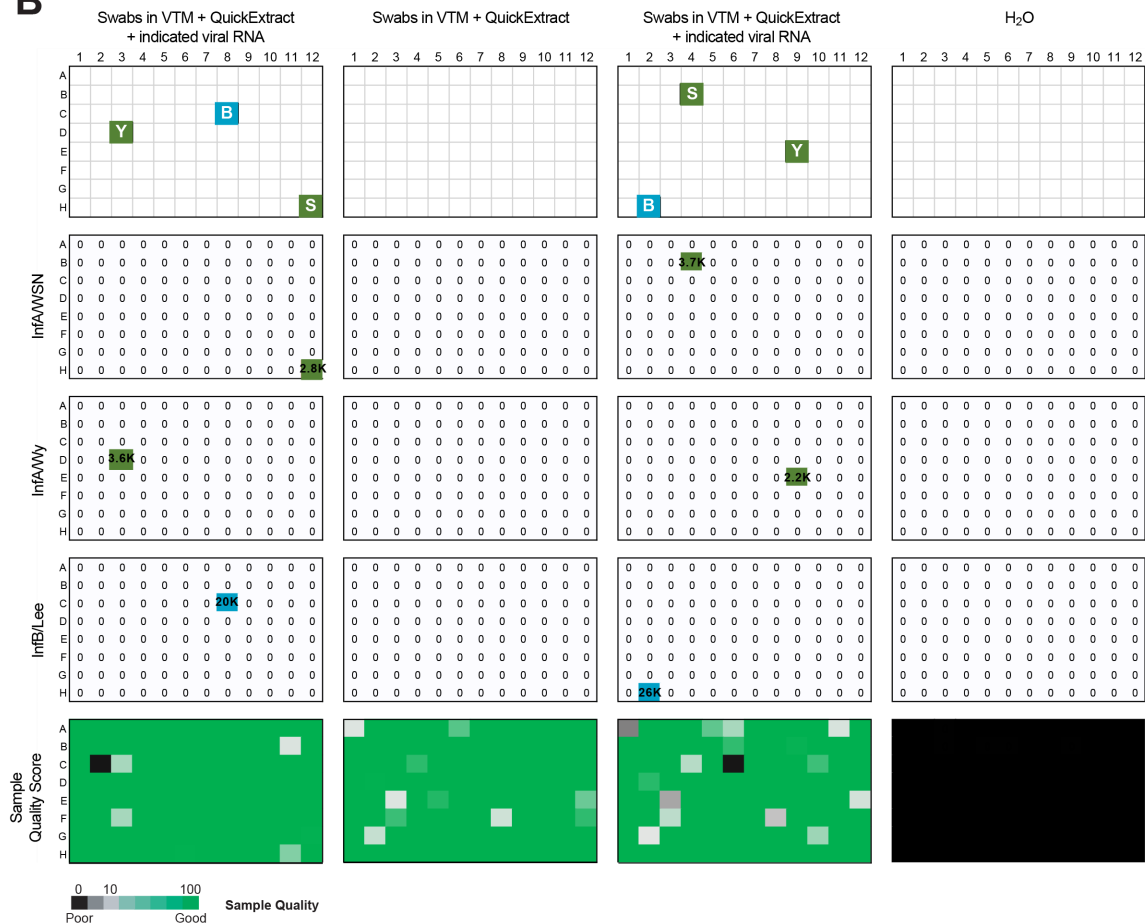

**Suppl. Fig. 9. Testing primers for the detection of Influenza and human rhino virus. A.** qPCR (using a fluorescent DNA dye Promega) performed on RNA purified from HEK cells infected with Influenza-A/WSN,-A/Wy, Influenza B/Lee, HRV A1a, A1b, or A2. Ct values are shown for respective samples. Primer selection was based on sensitive detection of viral RNA with a low degree of unspecific amplicon generation detected in wells where no specific RNA is expected. Primer sequences see Supplemental Table 2. **B.** For Influenza A and Influenza B a full set of 96 primers with well-specific indices was obtained. Clinical samples in VTM, inactivated by heat in QuickExtract were spiked (1:100) with RNA from HEK cells as used above (S: A/WSN; Y: A/Wy; B: B/Lee;). SARSeq was performed with 5 multiplexed primer pairs, N1, N3, rRNA, InfA, and InfB; the two latter and the rRNA/RTC quality score are shown. Analysis of reads allowed for separation of Inf A/WSN and A/Wy based on sequence differences, we also detected Inf B with high specificity. No cross-contamination, index hopping, or assignment ambiguity was observed.

**Suppl. Table 1. Guidelines and measures to prevent contamination which could result in false positives.**

| Possible source of contamination                                              | Measures for minimization                                                                                                                                                                                                                                       |
|-------------------------------------------------------------------------------|-----------------------------------------------------------------------------------------------------------------------------------------------------------------------------------------------------------------------------------------------------------------|
| <p><i>Sample cross contamination</i></p>                                      | <p>Pipette samples only with filtered tips, exchange gloves after handling sample plates/tubes</p>                                                                                                                                                              |
|                                                                               | <p>Bleach pipettes, tube racks, plate holders and benches regularly</p>                                                                                                                                                                                         |
|                                                                               | <p>Prepare buffers, primer mixes and other reaction master mixes in a clean space in which samples are not handled, if possible, with a separate set of pipettes than the ones used for pipetting samples</p>                                                   |
| <p><i>Amplicons produced in previous runs, while setting up reactions</i></p> | <p>Set up physically separated work spaces for pre- and post-amplification steps (not adjacent benches but two different rooms)</p>                                                                                                                             |
|                                                                               | <p>Bleach pipettes, tube racks, plate holders and benches regularly</p>                                                                                                                                                                                         |
|                                                                               | <p>Include UTP in all amplification reactions that generate the measured amplicon, being for NGS or other reactions done in the lab. Include the UDG treatment step before each round of amplification to remove possible contaminants from a previous run.</p> |
| <p><i>Amplicons sequenced in previous runs</i></p>                            | <p>Rotate the different sets of i5/i7 indices between consecutive runs. This way the most likely contaminant (amplicon from the previous run) can be filtered computationally.</p>                                                                              |
|                                                                               | <p>If the same set of i5/i7 indices must be used, record position of highly positive samples and assess whether positive positions from subsequent runs could be due to contamination.</p>                                                                      |
|                                                                               | <p>Wash the sequencer with bleach solution as indicated by the manufacturer. This is particularly important for all flow cells except HiSeq, namely MiSeq, NextSeq500/2000, NovaSeq, iSeq, MiniSeq, where tubing is not exchanged between independent runs.</p> |
