# Supplementary material for: Multiplexed detection of SARS-CoV-2 and other respiratory infections in high throughput by SARSeq
Source: PubMed Central journal article supplement (PMC8149640; doi:10.1038/s41467-021-22664-5), 2021-05-25
Supplement: 41467_2021_22664_MOESM3_ESM.pdf [file 41467_2021_22664_MOESM3_ESM.pdf]

## Description of Additional Supplementary Files

### **Title: Supplementary Data 1.**

**Description: Detailed step-by-step pipetting scheme for every step of the process, from sample preparation to quantifying the library for loading on the sequencer.**

Tab 1: Crude RNA preparation by QuickExtract and boiling

Tab 2: Setup of the reverse transcription reaction

Tab 3: Pipetting scheme for the PCR1 Top-up reaction

Tab 4: PCR pooling and Exostar treatment

Tab 5: Pipetting scheme for the setup of PCR2

Tab 6: NGS sample preparation

Tab7: NGS settings for MiSeq system

### **Title: Supplementary Data 2.**

**Description: All primer and amplicon sequences used in the study.**

Tab 1: A list of all forward primers and barcodes used for SARSeq

Tab 2: A list of all reverse primers and barcodes used for SARSeq

Tab 3: qPCR Primers used to optimize amplicons for Influenza and HRV

Tab 4: Sequences of all virus-specific amplicons detected in this manuscript

Tab 5: Oligonucleotides used to clone the T7 transcribed internal control without generating templates that interfere with primer synthesis regulations.
